# Supplementary material for: Covariation of redox potential profiles and water table level in peatland sites representing different drainage regimes: implications for ecological modelling
Source: Copernicus journal article supplement (doi:10.5194/egusphere-2024-2050), 2024-08-06
Supplement: Supplementary file 1 [file egusphere-2024-2050-supplement.pdf]

## Supplement 1: CWT figures

### LTD

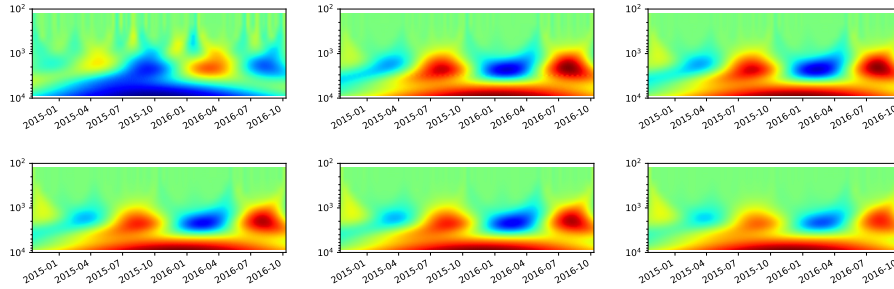

**Figure S1.** Top to bottom, left to right: Mexican hat wavelet coherence with 1) WTL data from the LTD plot; 2) soil temperature (soilT) at 5 cm depth; 3) soilT at 15 cm depth; 4) soilT at 25 cm depth; 5) soilT at 35 cm depth; 6) soilT at 45 cm depth.

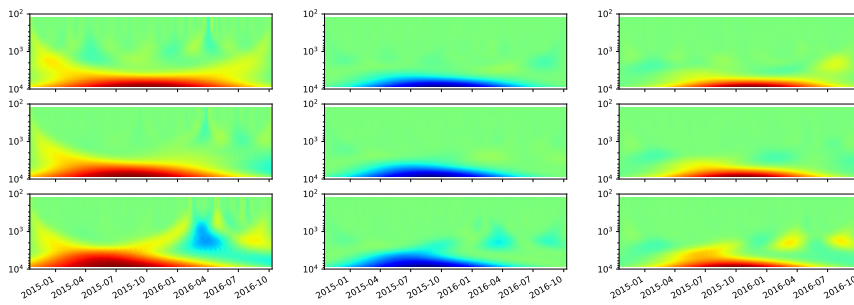

**Figure S2.** Left: Wavelet coherence between Mexican hat wave and  $E_h$  at LTD plot, 5 cm depth; center: interaction between  $E_h$  and WTL wavelets; right: interaction between  $E_h$  and soil temperature wavelets at LTD plot, 5 cm depth. 3 probes plotted separately.

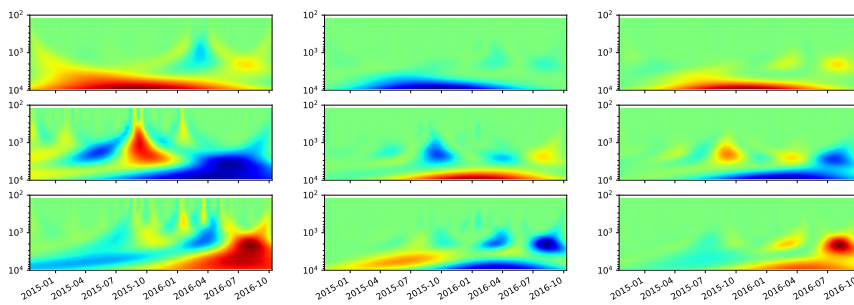

**Figure S3.** Left: Wavelet coherence between Mexican hat wave and  $E_h$  at LTD plot, 15 cm depth; center: interaction between  $E_h$  and WTL wavelets; right: interaction between  $E_h$  and soil temperature wavelets at LTD plot, 15 cm depth. 3 probes plotted separately.

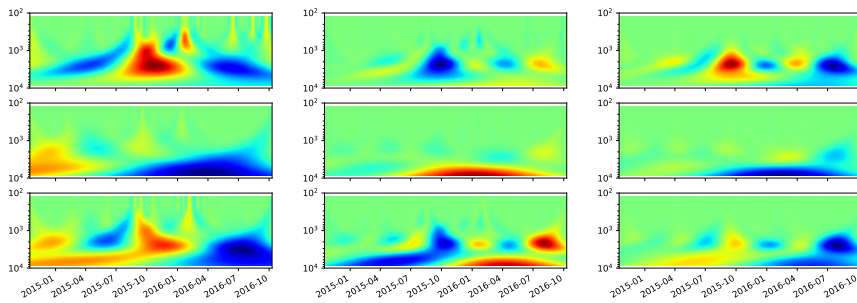

**Figure S4.** Left: Wavelet coherence between Mexican hat wave and  $E_h$  at LTD plot, 25 cm depth; center: interaction between  $E_h$  and WTL wavelets; right: interaction between  $E_h$  and soil temperature wavelets at LTD plot, 25 cm depth. 3 probes plotted separately.

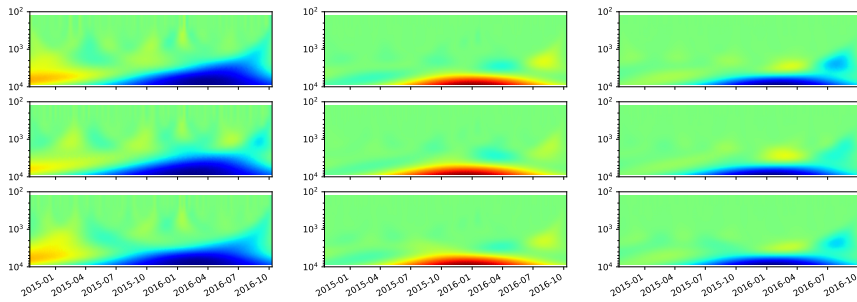

**Figure S5.** Left: Wavelet coherence between Mexican hat wave and  $E_h$  at LTD plot, 35 cm depth; center: interaction between  $E_h$  and WTL wavelets; right: interaction between  $E_h$  and soil temperature wavelets at LTD plot, 35 cm depth. 3 probes plotted separately.

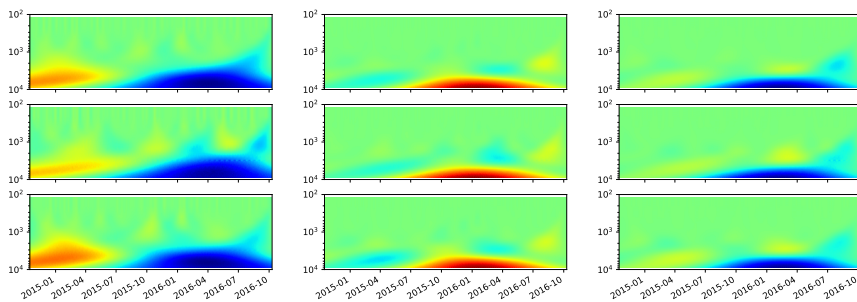

**Figure S6.** Left: Wavelet coherence between Mexican hat wave and  $E_h$  at LTD plot, 45 cm depth; center: interaction between  $E_h$  and WTL wavelets; right: interaction between  $E_h$  and soil temperature wavelets at LTD plot, 45 cm depth. 3 probes plotted separately.

**STD**

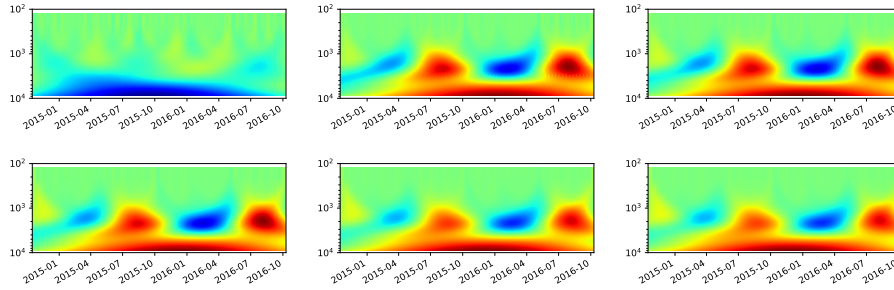

**Figure S7.** Top to bottom, left to right: Mexican hat wavelet coherence with 1) WTL data from the STD plot; 2) soil temperature (soilT) at 5 cm depth; 3) soilT at 15 cm depth, 4) soilT at 25 cm depth; 5) soilT at 35 cm depth; 6) soilT at 45 cm depth.

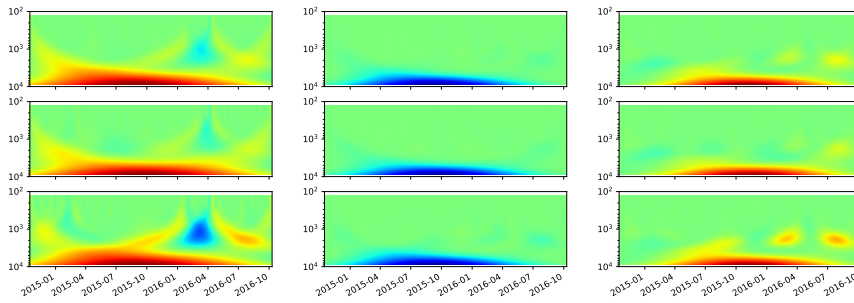

**Figure S8.** Left: Wavelet coherence between Mexican hat wave and  $E_h$  at the STD plot (5 cm depth); centre: interaction between  $E_h$  and WTL wavelets; right: interaction between  $E_h$  and soil temperature wavelets at the STD plot (5 cm depth). Three probes plotted separately.

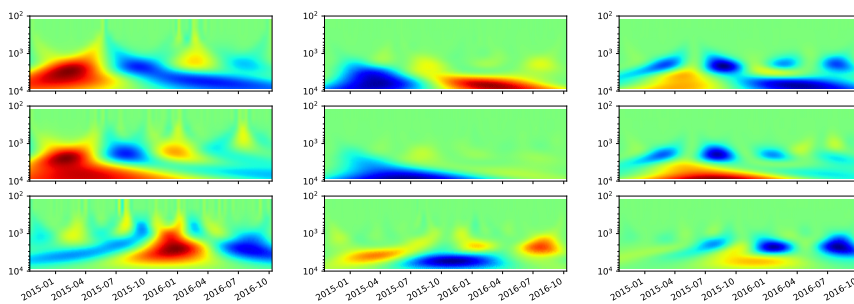

**Figure S9.** Left: Wavelet coherence between Mexican hat wave and  $E_h$  at STD plot, 15 cm depth; center: interaction between  $E_h$  and WTL wavelets; right: interaction between  $E_h$  and soil temperature wavelets at STD plot, 15 cm depth. 3 probes plotted separately.

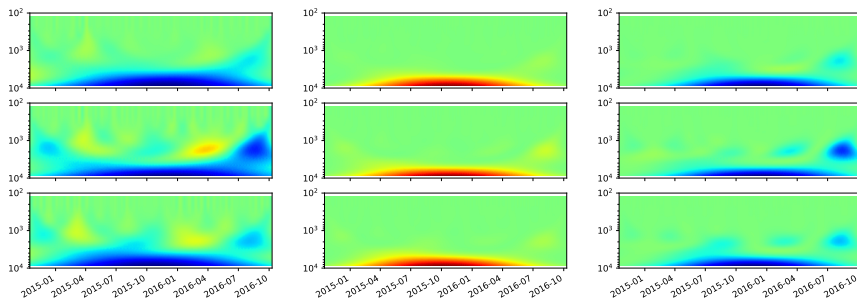

**Figure S10.** Left: Wavelet coherence between Mexican hat wave and  $E_h$  at the STD plot (25 cm depth); centre: interaction between  $E_h$  and WTL wavelets; right: interaction between  $E_h$  and soil temperature wavelets at the STD plot (25 cm depth). Three probes plotted separately.

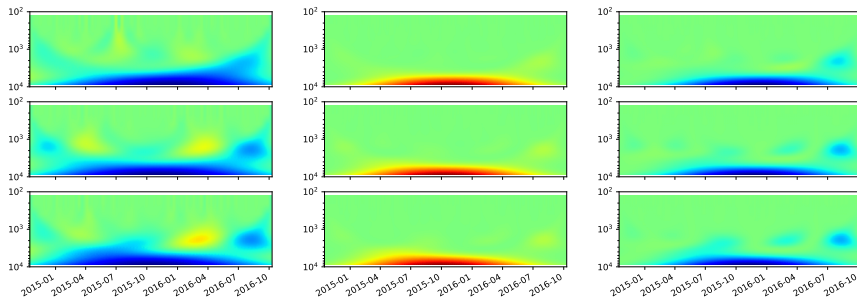

**Figure S11.** Left: Wavelet coherence between Mexican hat wave and  $E_h$  at STD plot, 35 cm depth; center: interaction between  $E_h$  and WTL wavelets; right: interaction between  $E_h$  and soil temperature wavelets at STD plot, 35 cm depth. 3 probes plotted separately.

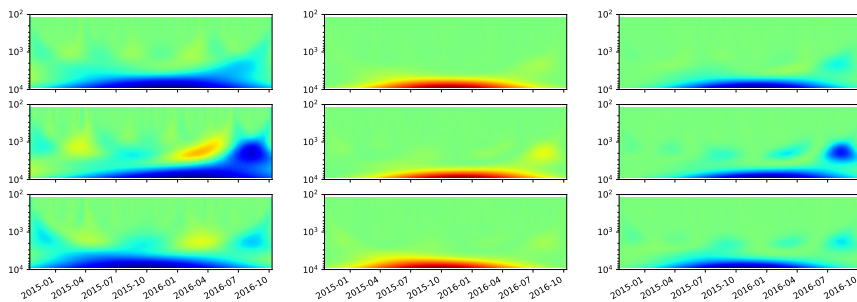

**Figure S12.** Left: Wavelet coherence between Mexican hat wave and  $E_h$  at the STD plot (45 cm depth); centre: interaction between  $E_h$  and WTL wavelets; right: interaction between  $E_h$  and soil temperature wavelets at the STD plot (45 cm depth). Three probes plotted separately.

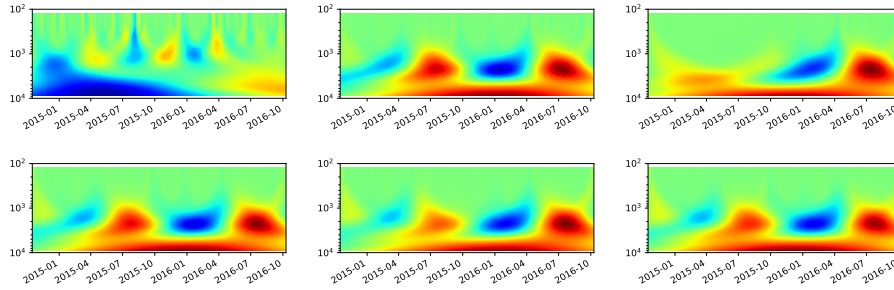

**Figure S13.** Top to bottom, left to right: Mexican hat wavelet coherence with 1) WTL data from the UD plot; 2) soil temperature (soilT) at 5 cm depth; 3) soilT at 15 cm depth, 4) soilT at 25 cm depth; 5) soilT at 35 cm depth; 6) soilT at 45 cm depth.

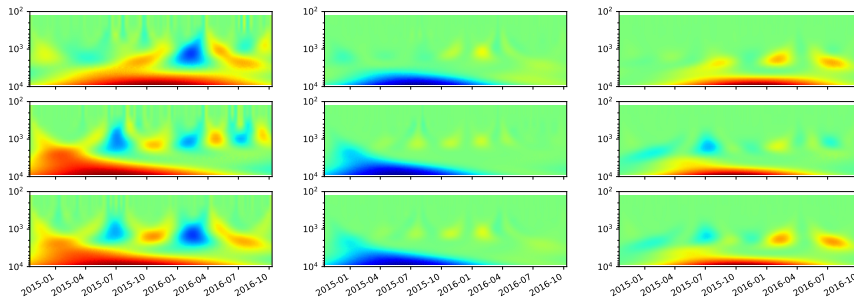

**Figure S14.** Left: Wavelet coherence between Mexican hat wave and  $E_h$  at the UD plot (5 cm depth); centre: interaction between  $E_h$  and WTL wavelets; right: interaction between  $E_h$  and soil temperature wavelets at the UD plot (5 cm depth). Three probes plotted separately.

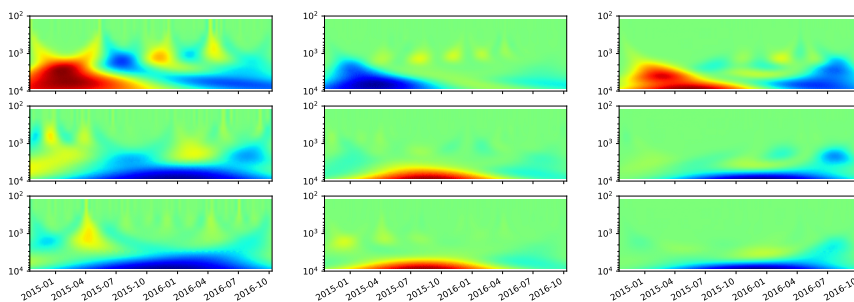

**Figure S15.** Left: Wavelet coherence between Mexican hat wave and  $E_h$  at UD plot, 15 cm depth; center: interaction between  $E_h$  and WTL wavelets; right: interaction between  $E_h$  and soil temperature wavelets at UD plot, 15 cm depth. 3 probes plotted separately.

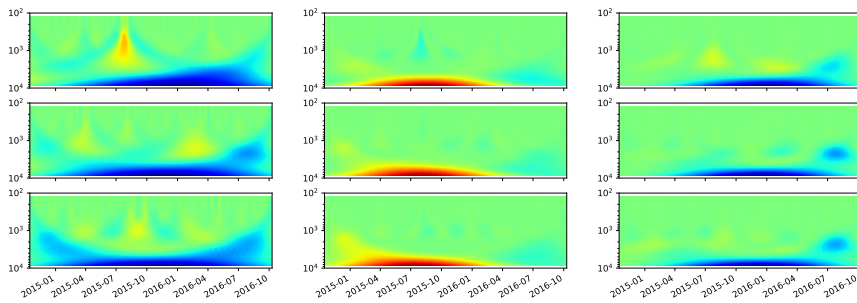

**Figure S16.** Left: Wavelet coherence between Mexican hat wave and  $E_h$  at the UD plot (25 cm depth); centre: interaction between  $E_h$  and WTL wavelets; right: interaction between  $E_h$  and soil temperature wavelets at the UD plot (25 cm depth). Three probes plotted separately.

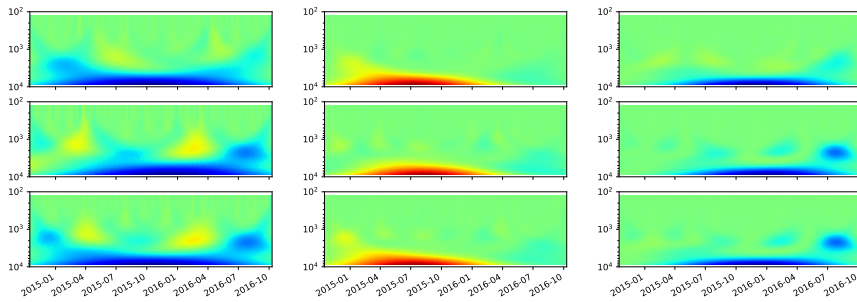

**Figure S17.** Left: Wavelet coherence between Mexican hat wave and  $E_h$  at UD plot, 35 cm depth; center: interaction between  $E_h$  and WTL wavelets; right: interaction between  $E_h$  and soil temperature wavelets at UD plot, 35 cm depth. 3 probes plotted separately.

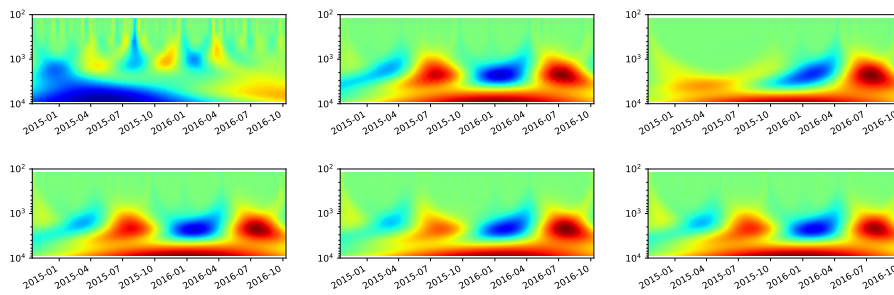

**Figure S18.** Left: Wavelet coherence between Mexican hat wave and  $E_h$  at the UD plot (45 cm depth); centre: interaction between  $E_h$  and WTL wavelets; right: interaction between  $E_h$  and soil temperature wavelets at the UD plot (45 cm depth). Three probes plotted separately.
